# Supplementary material for: Revealing the Key MSCs Niches and Pathogenic Genes in Influencing CEP Homeostasis: A Conjoint Analysis of Single-Cell and WGCNA
Source: Front Immunol. 2022 Jun 27;13:933721. doi: 10.3389/fimmu.2022.933721 (PMC9271696; doi:10.3389/fimmu.2022.933721)
Supplement: Supplementary Table 1 — The detailed information of genes in pink module as well as GO, KEGG enrichment functions. [file Table_1.xlsx]

## Sheet: pink module
genes in pink module
AARD
ADAM20
ADAMTS14
ADAMTS7
ADCY1
ADGRE3
ADGRF5
ADGRG4
AGPAT9
AIM1
AK1
AKIRIN1
ALDH16A1
ALDH1A1
AMBN
AMPD1
ANGPT1
ANK1
ANKMY1
ANKRD1
ANKRD18A
ANKRD53
ANKRD54
AP5B1
APOF
APOL6
ARHGAP23
ARNTL
ARRDC5
ASAP3
ASB11
ASTN1
ATF5
ATP11AUN
ATP2B3
AUP1
BANP
BCL2L11
BCL2L2
BCLAF1
BEST2
BHMT2
BICD2
BNC2
BRD4
C10orf62
C12orf50
C17orf97
C1orf177
C1orf233
C1S
C21orf140
C22orf34
C2orf27A
C3orf35
C4B_2
C7orf73
C8orf89
C9orf117
C9orf3
C9orf66
CA13
CABIN1
CACNB2
CACTIN
CALHM2
CAND1
CATSPER3
CATSPER4
CCDC154
CCDC63
CCDC68
CCDC88C
CCL1
CD101
CD19
CD300C
CD34
CD52
CD70
CD99
CDC27
CDHR4
CDK5RAP2
CEACAM8
CEBPE
CENPJ
CFHR2
CFI
CHD7
CHL1
CHMP6
CHRM3
CISD2
CKAP2
CLDN7
CLEC1B
CLIC3
CLPB
CLSTN3
CLTC
CMTR2
CNDP2
CNGA3
CNGB1
CNTF
COL12A1
COL1A2
COL3A1
COMMD6
COPE
CORO7
COX6B1
COX8C
CPXCR1
CRLF1
CSTF1
CTSG
CUBN
CYP3A7
DBN1
DCDC2C
DCTN4
DEFA1
DEFA3
DEFA4
DEFB114
DGKQ
DGKZ
DHFR
DHX37
DIO1
DLX1
DLX3
DMRTB1
DNAAF5
DNAL1
DNASE2B
DPYS
DSG3
EFCAB13
EFNB2
EIF1AD
EIF2B1
EIF3E
EIF5A2
ELANE
ELAVL2
ELOVL3
EML1
ENOSF1
ENPEP
ENTPD1
EPHA7
ERICH1
ERMN
EVPL
EXT1
EXTL3
EYA3
FABP6
FAM114A2
FAM124B
FAM177B
FAM198B
FAM25G
FAM3A
FAM50A
FAM98B
FANCF
FAT3
FBLIM1
FBLN5
FCRL2
FDCSP
FEM1A
FGD1
FGF9
FLG
FLJ44635
FNDC9
FOXB2
FOXL2
GABRA2
GABRD
GALC
GALNT3
GCGR
GCSAML
GDA
GIMAP5
GINM1
GINS3
GIPR
GJC2
GLRA4
GNA14
GNAI1
GNL3L
GOLGA7B
GPC4
GPR1
GPR139
GPR149
GPR37
GRXCR1
GUCY1A3
GUCY1B3
GZMK
HACD4
HAUS4
HBD
HCRT
HDAC6
HDAC9
HEPH
HEPHL1
HES4
HIC1
HIST1H1A
HIST1H4B
HIST1H4D
HIST3H3
HLA-C
HNRNPLL
HOGA1
HOXC11
HS6ST3
HTN3
HTR1F
HTR3B
IAPP
IFNA13
IFNA4
IKBIP
IL22RA1
IL2RB
IL4R
INSC
INSM2
IQCA1
ITGB1BP2
ITGB6
KANSL1
KCNG2
KDM4B
KHDC3L
KIAA0195
KIAA0430
KIAA1045
KIAA1462
KIAA1919
KIF1B
KIF4A
KIN
KIR2DL3
KLF16
KLF7
KLHL20
KRT33B
KRT79
KRT8
KRTAP13-2
KRTAP25-1
KRTAP5-6
KY
LACRT
LAMA5
LCE1A
LCT
LELP1
LEPROT
LGALS14
LGR5
LIN7A
LINGO4
LNX1
LOC100131303
LOC100289561
LOC400736
LPPR4
LRIF1
LRP8
LRRC18
LRRC29
LRRC3C
LRRC45
LRRC4C
LRRC52
LRRC69
LRRC8B
LRRIQ1
LRTOMT
LTF
LY6G6F
LY96
LYZ
MAD1L1
MAEL
MAFA
MAMLD1
MAN2A2
MAP1A
MAP2K7
MAPK8IP2
MAT1A
MCMBP
MCUR1
MEGF10
MEGF11
MEST
MFRP
MIP
MIR1-1HG
MMP12
MMP28
MMP8
MOBP
MOGAT3
MPO
MRGPRE
MRPS16
MS4A15
MS4A3
MSX2
MT1HL1
MTCH2
MTCP1
MUC19
MYOCD
NAB2
NAGS
NARS2
NBL1
NBPF6
NDUFA9
NEK2
NEU2
NFKBID
NLRP6
NODAL
NOP2
NOP56
NOS1
NOS3
NPR3
NQO1
NR1H3
NRSN2
NTN3
NUDT18
OAS3
OPALIN
OR13C2
OR1L1
OR2G6
OR2T12
OR4F4
OR51G2
OR51I1
OR52N2
OR6C1
OR6C68
OR9Q2
OSTF1
OXSM
PABPC4
PAK1IP1
PARD6B
PARK2
PARP16
PBLD
PCDHB2
PCM1
PCOLCE
PDE6B
PDHX
PDZRN4
PFDN6
PFKL
PGF
PHB
PHYHIPL
PIEZO2
PIFO
PIP4K2A
PKNOX1
PLAC1
PLAC8
PLVAP
PMP2
PODXL
POLL
POU3F2
POU4F2
PPAP2A
PPM1E
PPP1R9A
PPP1R9B
PRDM6
PRDM9
PRKAR2A
PRKCDBP
PRLH
PROP1
PROS1
PRR32
PRSS3
PRSS41
PRSS57
PSMD5
PTBP2
PTGDS
PTH
PTPRS
PVRL2
PZP
QSOX2
RAB3A
RAB3IP
RAD18
RAD50
RAF1
RAP1B
RAP2A
RBM42
RBMS3
RCSD1
RGS4
RGS5
RGS7BP
RHBDL1
RHOQ
RMI2
RNASE2
RNASE3
RNF152
RNF224
RNMTL1
ROBO1
RPA1
RPL22L1
RPL36
RPS6KB2
RSU1
RUNDC3B
SAFB
SAMD15
SASH1
SCARA5
SENP7
SEPHS2
SERPINA2
SERPINC1
SERPINE3
SGPP2
SHANK3
SHC3
SIAH3
SIGLEC12
SIGLEC9
SIKE1
SIRPG
SIX4
SKOR2
SLC10A2
SLC1A5
SLC25A10
SLC26A1
SLC28A2
SLC29A2
SLC29A3
SLC2A12
SLC2A4RG
SLC30A5
SLC35A5
SLC35G4
SLC52A2
SLC9A2
SLC9A9
SMARCC1
SMIM18
SMN2
SMS
SNAI1
SNAP25
SNX21
SPACA7
SPARCL1
SPATS2L
SPOCK2
SPTBN5
SPTSSB
SRPRB
SRRT
SSX2IP
ST7
STAT4
STEAP2
SULT1C3
SUN5
SUSD4
SV2C
SYCP2L
SYNDIG1L
SYNE3
TAS2R1
TBC1D4
TCHP
TDRP
TEK
TGIF2LY
THSD7A
THSD7B
TIMM17B
TJP2
TMEM119
TMEM136
TMEM150A
TMEM156
TMEM158
TMEM174
TMEM233
TMEM236
TMEM35
TMEM45B
TMEM74B
TMPO
TMPRSS6
TMPRSS9
TNFSF8
TNK1
TNKS2
TOP3A
TOR4A
TOX2
TP53
TP53INP1
TPGS2
TPSG1
TRAPPC9
TRIB3
TRIM72
TRIM8
TUBA8
UBE2Z
UPF2
USP17L7
UTS2B
UXT
VEGFC
VIMP
VPS13B
VPS36
VRK2
VWC2
WBP2NL
WDFY3
WDR81
WFDC12
WNT11
WNT9B
WRB
YY1AP1
ZBED2
ZBTB7A
ZBTB7C
ZDHHC17
ZMYND19
ZNF131
ZNF141
ZNF28
ZNF408
ZNF558
ZNF559
ZNF669
ZNF689
ZNF705E
ZNRF2

## Sheet: GO in pink module
	ONTOLOGY	ID	Description	GeneRatio	BgRatio	pvalue	p.adjust	qvalue	geneID	Count
GO:0050832	BP	GO:0050832	defense response to fungus	10/482	49/18723	3.89023e-07	0.0015666	0.00151965	CTSG/DEFA1/DEFA3/DEFA4/DEFB114/ELANE/FAM3A/HTN3/LTF/MPO	10
GO:0009620	BP	GO:0009620	response to fungus	10/482	60/18723	2.77037e-06	0.00557814	0.00541097	CTSG/DEFA1/DEFA3/DEFA4/DEFB114/ELANE/FAM3A/HTN3/LTF/MPO	10
GO:0031640	BP	GO:0031640	killing of cells of other organism	10/482	68/18723	8.88901e-06	0.011932	0.0115744	CFHR2/CTSG/DEFA1/DEFA3/DEFA4/ELANE/HTN3/LTF/LYZ/NLRP6	10
GO:0060249	BP	GO:0060249	anatomical structure homeostasis	22/482	314/18723	2.32596e-05	0.0234166	0.0227148	ADGRF5/ALDH1A1/ANGPT1/ATP2B3/CACNB2/CD34/CNGB1/CUBN/EXT1/IAPP/ITGB6/LACRT/LTF/LYZ/MAP1A/NOS3/PBLD/PRLH/PTH/SLC28A2/TJP2/TMEM119	22
GO:0031664	BP	GO:0031664	regulation of lipopolysaccharide-mediated signaling pathway	6/482	25/18723	3.29518e-05	0.0265394	0.025744	CACTIN/DEFB114/LACRT/LTF/LY96/SASH1	6
GO:0002227	BP	GO:0002227	innate immune response in mucosa	6/482	27/18723	5.27216e-05	0.035385	0.0343245	DEFA1/DEFA3/DEFA4/LTF/RNASE2/RNASE3	6
GO:0001894	BP	GO:0001894	tissue homeostasis	19/482	268/18723	7.0882e-05	0.0407774	0.0395554	ADGRF5/ALDH1A1/ANGPT1/CD34/CNGB1/CUBN/EXT1/IAPP/ITGB6/LACRT/LTF/LYZ/NOS3/PBLD/PRLH/PTH/SLC28A2/TJP2/TMEM119	19
GO:0050829	BP	GO:0050829	defense response to Gram-negative bacterium	10/482	88/18723	8.72441e-05	0.0439165	0.0426004	CTSG/DEFA1/DEFA3/DEFA4/DEFB114/ELANE/IL22RA1/LTF/LYZ/RNASE3	10
GO:0045179	CC	GO:0045179	apical cortex	4/512	10/19550	8.61215e-05	0.0216093	0.0200228	INSC/KHDC3L/SPTBN5/TCHP	4
GO:0035578	CC	GO:0035578	azurophil granule lumen	10/512	91/19550	0.000133751	0.0216093	0.0200228	CTSG/DEFA1/DEFA3/ELANE/LYZ/MPO/PLAC8/PRSS57/RNASE2/RNASE3	10
GO:0005775	CC	GO:0005775	vacuolar lumen	14/512	174/19550	0.000203928	0.0216093	0.0200228	CTSG/CUBN/DEFA1/DEFA3/ELANE/GALC/GPC4/LYZ/MPO/PLAC8/PRSS57/RNASE2/RNASE3/SPACA7	14
GO:0005766	CC	GO:0005766	primary lysosome	13/512	155/19550	0.000226988	0.0216093	0.0200228	CEACAM8/CTSG/DEFA1/DEFA3/DEFA4/ELANE/LYZ/MPO/PLAC8/PRSS57/RAP1B/RNASE2/RNASE3	13
GO:0042582	CC	GO:0042582	azurophil granule	13/512	155/19550	0.000226988	0.0216093	0.0200228	CEACAM8/CTSG/DEFA1/DEFA3/DEFA4/ELANE/LYZ/MPO/PLAC8/PRSS57/RAP1B/RNASE2/RNASE3	13
GO:0034774	CC	GO:0034774	secretory granule lumen	20/512	322/19550	0.000345833	0.0250677	0.0232272	CAND1/CTSG/DEFA1/DEFA3/DEFA4/ELANE/LTF/LYZ/MMP8/MPO/OSTF1/PFKL/PLAC8/PROS1/PRSS57/RNASE2/RNASE3/SPACA7/TOR4A/VEGFC	20
GO:0060205	CC	GO:0060205	cytoplasmic vesicle lumen	20/512	325/19550	0.000389552	0.0250677	0.0232272	CAND1/CTSG/DEFA1/DEFA3/DEFA4/ELANE/LTF/LYZ/MMP8/MPO/OSTF1/PFKL/PLAC8/PROS1/PRSS57/RNASE2/RNASE3/SPACA7/TOR4A/VEGFC	20
GO:0031983	CC	GO:0031983	vesicle lumen	20/512	327/19550	0.000421305	0.0250677	0.0232272	CAND1/CTSG/DEFA1/DEFA3/DEFA4/ELANE/LTF/LYZ/MMP8/MPO/OSTF1/PFKL/PLAC8/PROS1/PRSS57/RNASE2/RNASE3/SPACA7/TOR4A/VEGFC	20

## Sheet: KEGG in pink module
	ID	Description	GeneRatio	BgRatio	pvalue	p.adjust	qvalue	geneID	Count
hsa04926	hsa04926	Relaxin signaling pathway	10/225	129/8142	0.00296422	0.580508	0.580508	107/1278/1281/2770/5609/4842/4846/5894/53358/7424	10
hsa04151	hsa04151	PI3K-Akt signaling pathway	19/225	354/8142	0.00419139	0.580508	0.580508	284/10018/930/1278/2254/3447/3441/3560/3566/3694/3911/4515/4846/5228/5894/6199/7010/7157/7424	19
hsa00330	hsa00330	Arginine and proline metabolism	5/225	51/8142	0.0128903	0.882209	0.882209	55748/112817/4842/4846/6611	5
hsa04970	hsa04970	Salivary secretion	7/225	92/8142	0.0134625	0.882209	0.882209	107/492/54831/1131/3347/4069/4842	7
hsa00220	hsa00220	Arginine biosynthesis	3/225	22/8142	0.021764	0.882209	0.882209	162417/4842/4846	3
hsa04978	hsa04978	Mineral absorption	5/225	60/8142	0.0245754	0.882209	0.882209	492/9843/341208/645745/261729	5
hsa00534	hsa00534	Glycosaminoglycan biosynthesis - heparan sulfate / heparin	3/225	24/8142	0.0274762	0.882209	0.882209	2131/2137/266722	3
hsa03450	hsa03450	Non-homologous end-joining	2/225	13/8142	0.0485361	0.882209	0.882209	27343/10111	2
hsa05150	hsa05150	Staphylococcus aureus infection	6/225	96/8142	0.0494368	0.882209	0.882209	716/3426/1667/1668/1669/3884	6
hsa03460	hsa03460	Fanconi anemia pathway	4/225	54/8142	0.0614089	0.882209	0.882209	2188/116028/6117/7156	4
hsa05146	hsa05146	Amoebiasis	6/225	102/8142	0.0628423	0.882209	0.882209	107/1278/1281/1511/9630/3911	6
hsa04015	hsa04015	Rap1 signaling pathway	10/225	210/8142	0.0657102	0.882209	0.882209	107/284/2254/2770/84612/5228/5894/5908/7010/7424	10
hsa05160	hsa05160	Hepatitis C	8/225	157/8142	0.0691721	0.882209	0.882209	1366/3646/3447/3441/10062/4940/5894/7157	8
hsa04630	hsa04630	JAK-STAT signaling pathway	8/225	162/8142	0.0797547	0.882209	0.882209	1270/3447/3441/58985/3560/3566/5894/6775	8
hsa04610	hsa04610	Complement and coagulation cascades	5/225	85/8142	0.0857027	0.882209	0.882209	716/3080/3426/5627/462	5
hsa05202	hsa05202	Transcriptional misregulation in cancer	9/225	193/8142	0.0866101	0.882209	0.882209	1053/1667/1668/1669/1991/3560/4353/51804/7157	9
hsa04742	hsa04742	Taste transduction	5/225	86/8142	0.0890578	0.882209	0.882209	1131/2555/3355/9177/50834	5
hsa05225	hsa05225	Hepatocellular carcinoma	8/225	168/8142	0.0936622	0.882209	0.882209	1728/5894/6199/53358/6599/7157/7481/7484	8
hsa03440	hsa03440	Homologous recombination	3/225	41/8142	0.103311	0.882209	0.882209	10111/6117/7156	3
hsa05169	hsa05169	Epstein-Barr virus infection	9/225	202/8142	0.107063	0.882209	0.882209	10018/930/953/3107/3447/3441/5609/4940/7157	9
hsa05224	hsa05224	Breast cancer	7/225	147/8142	0.112414	0.882209	0.882209	2254/5894/6199/53358/7157/7481/7484	7
hsa05221	hsa05221	Acute myeloid leukemia	4/225	67/8142	0.11362	0.882209	0.882209	1053/4353/5894/6199	4
hsa05226	hsa05226	Gastric cancer	7/225	149/8142	0.118412	0.882209	0.882209	2254/5894/6199/53358/7157/7481/7484	7
hsa05165	hsa05165	Human papillomavirus infection	13/225	331/8142	0.127557	0.882209	0.882209	1278/57801/3107/3447/3441/3694/3911/84612/5894/6199/7157/7481/7484	13
hsa05230	hsa05230	Central carbon metabolism in cancer	4/225	70/8142	0.127785	0.882209	0.882209	5211/5894/6510/7157	4
hsa04611	hsa04611	Platelet activation	6/225	124/8142	0.128436	0.882209	0.882209	107/1278/1281/2770/4846/5908	6
hsa04360	hsa04360	Axon guidance	8/225	182/8142	0.131144	0.882209	0.882209	1948/2045/2770/57689/4917/84612/5894/6091	8
hsa04614	hsa04614	Renin-angiotensin system	2/225	23/8142	0.131802	0.882209	0.882209	1511/2028	2
hsa01522	hsa01522	Endocrine resistance	5/225	98/8142	0.134387	0.882209	0.882209	107/5894/6199/53358/7157	5
hsa00230	hsa00230	Purine metabolism	6/225	128/8142	0.142978	0.882209	0.882209	107/203/270/953/9615/5158	6
hsa04916	hsa04916	Melanogenesis	5/225	101/8142	0.147082	0.882209	0.882209	107/2770/5894/7481/7484	5
hsa04914	hsa04914	Progesterone-mediated oocyte maturation	5/225	102/8142	0.151424	0.882209	0.882209	107/996/2770/8379/5894	5
hsa04972	hsa04972	Pancreatic secretion	5/225	102/8142	0.151424	0.882209	0.882209	107/492/1131/5646/5908	5
hsa04650	hsa04650	Natural killer cell mediated cytotoxicity	6/225	131/8142	0.154363	0.882209	0.882209	3107/3447/3441/3804/5894/53358	6
hsa04974	hsa04974	Protein digestion and absorption	5/225	103/8142	0.15582	0.882209	0.882209	1303/1278/1281/5646/6510	5
hsa04024	hsa04024	cAMP signaling pathway	9/225	221/8142	0.158331	0.882209	0.882209	107/492/1261/1258/2696/2770/3355/5894/5908	9
hsa04950	hsa04950	Maturity onset diabetes of the young	2/225	26/8142	0.160661	0.882209	0.882209	3375/389692	2
hsa00270	hsa00270	Cysteine and methionine metabolism	3/225	51/8142	0.16625	0.882209	0.882209	23743/4143/6611	3
hsa00062	hsa00062	Fatty acid elongation	2/225	27/8142	0.170523	0.882209	0.882209	83401/401494	2
hsa01040	hsa01040	Biosynthesis of unsaturated fatty acids	2/225	27/8142	0.170523	0.882209	0.882209	83401/401494	2
hsa01521	hsa01521	EGFR tyrosine kinase inhibitor resistance	4/225	79/8142	0.174261	0.882209	0.882209	10018/5894/6199/53358	4
hsa04931	hsa04931	Insulin resistance	5/225	108/8142	0.178562	0.882209	0.882209	4846/10062/6199/9882/57761	5
hsa00600	hsa00600	Sphingolipid metabolism	3/225	53/8142	0.179973	0.882209	0.882209	2581/4759/130367	3
hsa04961	hsa04961	Endocrine and other factor-regulated calcium reabsorption	3/225	53/8142	0.179973	0.882209	0.882209	492/1213/5741	3
hsa05320	hsa05320	Autoimmune thyroid disease	3/225	53/8142	0.179973	0.882209	0.882209	3107/3447/3441	3
hsa04915	hsa04915	Estrogen signaling pathway	6/225	138/8142	0.182404	0.882209	0.882209	107/2770/3884/4846/5894/53358	6
hsa04066	hsa04066	HIF-1 signaling pathway	5/225	109/8142	0.183255	0.882209	0.882209	284/4846/5211/6199/7010	5
hsa04371	hsa04371	Apelin signaling pathway	6/225	139/8142	0.186568	0.882209	0.882209	107/2770/4842/4846/5894/6199	6
hsa04010	hsa04010	MAPK signaling pathway	11/225	294/8142	0.190328	0.882209	0.882209	284/783/2254/5609/23542/5228/5894/5908/7010/7157/7424	11
hsa04744	hsa04744	Phototransduction	2/225	29/8142	0.190527	0.882209	0.882209	1258/5158	2
hsa04510	hsa04510	Focal adhesion	8/225	201/8142	0.192401	0.882209	0.882209	1278/3694/3911/5228/5894/5908/53358/7424	8
hsa04080	hsa04080	Neuroactive ligand-receptor interaction	13/225	362/8142	0.20168	0.882209	0.882209	1131/1511/2555/2563/2642/2696/3060/3355/3375/51052/5646/5741/257313	13
hsa01232	hsa01232	Nucleotide metabolism	4/225	85/8142	0.208019	0.882209	0.882209	203/270/953/9615	4
hsa04012	hsa04012	ErbB signaling pathway	4/225	85/8142	0.208019	0.882209	0.882209	5609/5894/6199/53358	4
hsa01212	hsa01212	Fatty acid metabolism	3/225	57/8142	0.20827	0.882209	0.882209	83401/401494/54995	3
hsa00052	hsa00052	Galactose metabolism	2/225	31/8142	0.210823	0.882209	0.882209	3938/5211	2
hsa00410	hsa00410	beta-Alanine metabolism	2/225	31/8142	0.210823	0.882209	0.882209	55748/1807	2
hsa04911	hsa04911	Insulin secretion	4/225	86/8142	0.213822	0.882209	0.882209	107/1131/5864/6616	4
hsa05210	hsa05210	Colorectal cancer	4/225	86/8142	0.213822	0.882209	0.882209	10018/5894/6199/7157	4
hsa04512	hsa04512	ECM-receptor interaction	4/225	88/8142	0.22556	0.882209	0.882209	1278/3694/3911/22987	4
hsa04540	hsa04540	Gap junction	4/225	88/8142	0.22556	0.882209	0.882209	107/2770/5894/51807	4
hsa04730	hsa04730	Long-term depression	3/225	60/8142	0.230103	0.882209	0.882209	2770/4842/5894	3
hsa00051	hsa00051	Fructose and mannose metabolism	2/225	33/8142	0.231319	0.882209	0.882209	55556/5211	2
hsa04727	hsa04727	GABAergic synapse	4/225	89/8142	0.231491	0.882209	0.882209	107/2555/2563/2770	4
hsa04071	hsa04071	Sphingolipid signaling pathway	5/225	119/8142	0.232473	0.882209	0.882209	2770/4846/5894/130367/7157	5
hsa04722	hsa04722	Neurotrophin signaling pathway	5/225	119/8142	0.232473	0.882209	0.882209	5609/5894/5908/53358/7157	5
hsa00561	hsa00561	Glycerolipid metabolism	3/225	61/8142	0.237475	0.882209	0.882209	1609/8525/346606	3
hsa04919	hsa04919	Thyroid hormone signaling pathway	5/225	121/8142	0.24275	0.882209	0.882209	1733/5211/5894/9882/7157	5
hsa05032	hsa05032	Morphine addiction	4/225	91/8142	0.243466	0.882209	0.882209	107/2555/2563/2770	4
hsa04213	hsa04213	Longevity regulating pathway - multiple species	3/225	62/8142	0.244888	0.882209	0.882209	107/81570/6199	3
hsa04621	hsa04621	NOD-like receptor signaling pathway	7/225	184/8142	0.24675	0.882209	0.882209	1667/1668/1669/3447/3441/171389/4940	7
hsa03250	hsa03250	Viral life cycle - HIV-1	3/225	63/8142	0.252337	0.882209	0.882209	23299/79643/4130	3
hsa05217	hsa05217	Basal cell carcinoma	3/225	63/8142	0.252337	0.882209	0.882209	7157/7481/7484	3
hsa05034	hsa05034	Alcoholism	7/225	187/8142	0.259402	0.882209	0.882209	2770/10013/9734/5894/53358/3177/55315	7
hsa00130	hsa00130	Ubiquinone and other terpenoid-quinone biosynthesis	1/225	11/8142	0.265416	0.882209	0.882209	1728	1
hsa04613	hsa04613	Neutrophil extracellular trap formation	7/225	190/8142	0.272238	0.882209	0.882209	1511/1991/10013/9734/4353/5894/27180	7
hsa04720	hsa04720	Long-term potentiation	3/225	67/8142	0.282425	0.882209	0.882209	107/5894/5908	3
hsa05163	hsa05163	Human cytomegalovirus infection	8/225	225/8142	0.283275	0.882209	0.882209	107/2770/3107/3447/3441/5894/6199/7157	8
hsa05231	hsa05231	Choline metabolism in cancer	4/225	98/8142	0.286351	0.882209	0.882209	1609/8525/5894/6199	4
hsa05161	hsa05161	Hepatitis B	6/225	162/8142	0.290875	0.882209	0.882209	3447/3441/5609/5894/6775/7157	6
hsa04060	hsa04060	Cytokine-cytokine receptor interaction	10/225	295/8142	0.298813	0.882209	0.882209	6346/970/1270/3447/3441/58985/3560/3566/4838/944	10
hsa04933	hsa04933	AGE-RAGE signaling pathway in diabetic complications	4/225	100/8142	0.298815	0.882209	0.882209	1278/1281/4846/7424	4
hsa05033	hsa05033	Nicotine addiction	2/225	40/8142	0.303533	0.882209	0.882209	2555/2563	2
hsa04622	hsa04622	RIG-I-like receptor signaling pathway	3/225	70/8142	0.305197	0.882209	0.882209	3447/3441/80143	3
hsa04014	hsa04014	Ras signaling pathway	8/225	232/8142	0.311759	0.882209	0.882209	284/2254/5228/5894/5908/53358/7010/7424	8
hsa05219	hsa05219	Bladder cancer	2/225	41/8142	0.313801	0.882209	0.882209	5894/7157	2
hsa04022	hsa04022	cGMP-PKG signaling pathway	6/225	167/8142	0.315114	0.882209	0.882209	107/492/1258/2770/4846/5894	6
hsa05218	hsa05218	Melanoma	3/225	72/8142	0.320426	0.882209	0.882209	2254/5894/7157	3
hsa04620	hsa04620	Toll-like receptor signaling pathway	4/225	104/8142	0.323921	0.882209	0.882209	3447/3441/23643/5609	4
hsa05332	hsa05332	Graft-versus-host disease	2/225	42/8142	0.324036	0.882209	0.882209	3107/3804	2
hsa04910	hsa04910	Insulin signaling pathway	5/225	137/8142	0.328412	0.882209	0.882209	5576/5894/23433/6199/53358	5
hsa05415	hsa05415	Diabetic cardiomyopathy	7/225	203/8142	0.329551	0.882209	0.882209	1278/1281/1340/341947/4704/4846/9882	7
hsa00860	hsa00860	Porphyrin metabolism	2/225	43/8142	0.334231	0.882209	0.882209	9843/341208	2
hsa04928	hsa04928	Parathyroid hormone synthesis, secretion and action	4/225	106/8142	0.336535	0.882209	0.882209	107/2770/5741/5894	4
hsa05205	hsa05205	Proteoglycans in cancer	7/225	205/8142	0.338551	0.882209	0.882209	286/1278/5894/6199/7157/7481/7484	7
hsa05162	hsa05162	Measles	5/225	139/8142	0.339398	0.882209	0.882209	3447/3441/3560/4940/7157	5
hsa01230	hsa01230	Biosynthesis of amino acids	3/225	75/8142	0.343277	0.882209	0.882209	4143/162417/5211	3
hsa05214	hsa05214	Glioma	3/225	75/8142	0.343277	0.882209	0.882209	5894/53358/7157	3
hsa00730	hsa00730	Thiamine metabolism	1/225	15/8142	0.343426	0.882209	0.882209	203	1
hsa04020	hsa04020	Calcium signaling pathway	8/225	240/8142	0.344998	0.882209	0.882209	107/492/1131/2254/9630/4842/4846/7424	8
hsa04971	hsa04971	Gastric acid secretion	3/225	76/8142	0.350885	0.882209	0.882209	107/1131/2770	3
hsa05133	hsa05133	Pertussis	3/225	76/8142	0.350885	0.882209	0.882209	716/2770/23643	3
hsa05212	hsa05212	Pancreatic cancer	3/225	76/8142	0.350885	0.882209	0.882209	5894/6199/7157	3
hsa05220	hsa05220	Chronic myeloid leukemia	3/225	76/8142	0.350885	0.882209	0.882209	5894/53358/7157	3
hsa04721	hsa04721	Synaptic vesicle cycle	3/225	78/8142	0.366069	0.882209	0.882209	1213/5864/6616	3
hsa05170	hsa05170	Human immunodeficiency virus 1 infection	7/225	212/8142	0.370279	0.882209	0.882209	2770/3107/3447/3441/5609/5894/6199	7
hsa00450	hsa00450	Selenocompound metabolism	1/225	17/8142	0.37928	0.882209	0.882209	22928	1
hsa00910	hsa00910	Nitrogen metabolism	1/225	17/8142	0.37928	0.882209	0.882209	377677	1
hsa05417	hsa05417	Lipid and atherosclerosis	7/225	215/8142	0.383946	0.882209	0.882209	3447/3441/23643/5609/4846/5908/7157	7
hsa04670	hsa04670	Leukocyte transendothelial migration	4/225	114/8142	0.38706	0.882209	0.882209	4267/1366/2770/5908	4
hsa04072	hsa04072	Phospholipase D signaling pathway	5/225	148/8142	0.389065	0.882209	0.882209	107/1609/8525/5894/53358	5
hsa04723	hsa04723	Retrograde endocannabinoid signaling	5/225	148/8142	0.389065	0.882209	0.882209	107/2555/2563/2770/4704	5
hsa04726	hsa04726	Serotonergic synapse	4/225	115/8142	0.393357	0.882209	0.882209	2770/3355/9177/5894	4
hsa04514	hsa04514	Cell adhesion molecules	5/225	149/8142	0.394584	0.882209	0.882209	947/4267/1366/3107/57689	5
hsa00061	hsa00061	Fatty acid biosynthesis	1/225	18/8142	0.396469	0.882209	0.882209	54995	1
hsa00511	hsa00511	Other glycan degradation	1/225	18/8142	0.396469	0.882209	0.882209	4759	1
hsa01210	hsa01210	2-Oxocarboxylic acid metabolism	1/225	19/8142	0.413184	0.882209	0.882209	162417	1
hsa05166	hsa05166	Human T-cell leukemia virus 1 infection	7/225	222/8142	0.415876	0.882209	0.882209	107/996/3107/3560/8379/4488/7157	7
hsa01240	hsa01240	Biosynthesis of cofactors	5/225	153/8142	0.416612	0.882209	0.882209	203/1719/4143/1728/54995	5
hsa04935	hsa04935	Growth hormone synthesis, secretion and action	4/225	119/8142	0.418437	0.882209	0.882209	107/2770/5894/53358	4
hsa05208	hsa05208	Chemical carcinogenesis - reactive oxygen species	7/225	223/8142	0.420432	0.882209	0.882209	1340/341947/5609/4704/1728/5894/10861	7
hsa04921	hsa04921	Oxytocin signaling pathway	5/225	154/8142	0.422101	0.882209	0.882209	107/783/2770/4846/5894	5
hsa04932	hsa04932	Non-alcoholic fatty liver disease	5/225	155/8142	0.427582	0.882209	0.882209	10018/1340/341947/4704/10062	5
hsa04934	hsa04934	Cushing syndrome	5/225	155/8142	0.427582	0.882209	0.882209	107/2770/5908/7481/7484	5
hsa00670	hsa00670	One carbon pool by folate	1/225	20/8142	0.429439	0.882209	0.882209	1719	1
hsa04150	hsa04150	mTOR signaling pathway	5/225	156/8142	0.433053	0.882209	0.882209	5894/220441/6199/7481/7484	5
hsa04260	hsa04260	Cardiac muscle contraction	3/225	87/8142	0.433397	0.882209	0.882209	783/1340/341947	3
hsa04062	hsa04062	Chemokine signaling pathway	6/225	192/8142	0.43886	0.882209	0.882209	107/6346/2770/5894/5908/53358	6
hsa00770	hsa00770	Pantothenate and CoA biosynthesis	1/225	21/8142	0.445245	0.882209	0.882209	1807	1
hsa04211	hsa04211	Longevity regulating pathway	3/225	89/8142	0.448032	0.882209	0.882209	107/6199/7157	3
hsa05167	hsa05167	Kaposi sarcoma-associated herpesvirus infection	6/225	194/8142	0.44871	0.882209	0.882209	3107/3447/3441/5609/5894/7157	6
hsa00340	hsa00340	Histidine metabolism	1/225	22/8142	0.460615	0.882209	0.882209	55748	1
hsa04923	hsa04923	Regulation of lipolysis in adipocytes	2/225	56/8142	0.46108	0.882209	0.882209	107/2770	2
hsa04658	hsa04658	Th1 and Th2 cell differentiation	3/225	92/8142	0.469695	0.882209	0.882209	3560/3566/6775	3
hsa05016	hsa05016	Huntington disease	9/225	306/8142	0.47288	0.882209	0.882209	1213/1340/341947/51164/83544/5609/4704/7157/51807	9
hsa03060	hsa03060	Protein export	1/225	23/8142	0.475561	0.882209	0.882209	58477	1
hsa03430	hsa03430	Mismatch repair	1/225	23/8142	0.475561	0.882209	0.882209	6117	1
hsa04964	hsa04964	Proximal tubule bicarbonate reclamation	1/225	23/8142	0.475561	0.882209	0.882209	1468	1
hsa04912	hsa04912	GnRH signaling pathway	3/225	93/8142	0.476832	0.882209	0.882209	107/5609/5894	3
hsa05323	hsa05323	Rheumatoid arthritis	3/225	93/8142	0.476832	0.882209	0.882209	284/5741/7010	3
hsa00240	hsa00240	Pyrimidine metabolism	2/225	58/8142	0.479372	0.882209	0.882209	1807/953	2
hsa05213	hsa05213	Endometrial cancer	2/225	58/8142	0.479372	0.882209	0.882209	5894/7157	2
hsa04350	hsa04350	TGF-beta signaling pathway	3/225	94/8142	0.483925	0.882209	0.882209	4681/4838/6199	3
hsa04370	hsa04370	VEGF signaling pathway	2/225	59/8142	0.488376	0.882209	0.882209	4846/5894	2
hsa04977	hsa04977	Vitamin digestion and absorption	1/225	24/8142	0.490094	0.882209	0.882209	8029	1
hsa04310	hsa04310	Wnt signaling pathway	5/225	167/8142	0.492336	0.882209	0.882209	2239/8549/7157/7481/7484	5
hsa04142	hsa04142	Lysosome	4/225	132/8142	0.497885	0.882209	0.882209	1213/1511/58511/2581	4
hsa05414	hsa05414	Dilated cardiomyopathy	3/225	96/8142	0.497972	0.882209	0.882209	107/783/3694	3
hsa04530	hsa04530	Tight junction	5/225	169/8142	0.502888	0.882209	0.882209	1366/5609/84612/9414/51807	5
hsa03015	hsa03015	mRNA surveillance pathway	3/225	97/8142	0.504924	0.882209	0.882209	1477/8761/26019	3
hsa04070	hsa04070	Phosphatidylinositol signaling system	3/225	97/8142	0.504924	0.882209	0.882209	1609/8525/5305	3
hsa04666	hsa04666	Fc gamma R-mediated phagocytosis	3/225	97/8142	0.504924	0.882209	0.882209	55616/5894/6199	3
hsa04713	hsa04713	Circadian entrainment	3/225	97/8142	0.504924	0.882209	0.882209	107/2770/4842	3
hsa00140	hsa00140	Steroid hormone biosynthesis	2/225	61/8142	0.506088	0.882209	0.882209	1551/220074	2
hsa05164	hsa05164	Influenza A	5/225	171/8142	0.513356	0.882209	0.882209	3447/3441/4940/5646/5894	5
hsa00790	hsa00790	Folate biosynthesis	1/225	26/8142	0.51797	0.882209	0.882209	1719	1
hsa04640	hsa04640	Hematopoietic cell lineage	3/225	99/8142	0.518678	0.882209	0.882209	930/947/3566	3
hsa04210	hsa04210	Apoptosis	4/225	136/8142	0.521428	0.882209	0.882209	10018/5894/7157/51807	4
hsa00310	hsa00310	Lysine degradation	2/225	63/8142	0.5234	0.882209	0.882209	93166/56979	2
hsa04623	hsa04623	Cytosolic DNA-sensing pathway	2/225	63/8142	0.5234	0.882209	0.882209	3447/3441	2
hsa04061	hsa04061	Viral protein interaction with cytokine and cytokine receptor	3/225	100/8142	0.525477	0.882209	0.882209	6346/58985/3560	3
hsa05418	hsa05418	Fluid shear stress and atherosclerosis	4/225	139/8142	0.53874	0.882209	0.882209	5609/4846/1728/7157	4
hsa05142	hsa05142	Chagas disease	3/225	102/8142	0.538918	0.882209	0.882209	107/9630/2770	3
hsa05321	hsa05321	Inflammatory bowel disease	2/225	65/8142	0.540302	0.882209	0.882209	3566/6775	2
hsa04144	hsa04144	Endocytosis	7/225	251/8142	0.544896	0.882209	0.882209	55616/79643/1213/3107/3560/84612/51028	7
hsa04936	hsa04936	Alcoholic liver disease	4/225	142/8142	0.555735	0.882209	0.882209	3447/3441/23643/5609	4
hsa04740	hsa04740	Olfactory transduction	12/225	439/8142	0.558681	0.882209	0.882209	1261/1258/392376/26737/391211/127064/81282/390063/390077/390321/403284/219957	12
hsa05022	hsa05022	Pathways of neurodegeneration - multiple diseases	13/225	476/8142	0.559238	0.882209	0.882209	1131/1340/341947/51164/83544/2861/5609/4704/4842/5894/51807/7481/7484	13
hsa04550	hsa04550	Signaling pathways regulating pluripotency of stem cells	4/225	143/8142	0.561326	0.882209	0.882209	4838/5894/7481/7484	4
hsa04810	hsa04810	Regulation of actin cytoskeleton	6/225	218/8142	0.562716	0.882209	0.882209	1131/2245/2254/3694/5305/5894	6
hsa00830	hsa00830	Retinol metabolism	2/225	68/8142	0.564871	0.882209	0.882209	216/1551	2
hsa04664	hsa04664	Fc epsilon RI signaling pathway	2/225	68/8142	0.564871	0.882209	0.882209	5609/5894	2
hsa00030	hsa00030	Pentose phosphate pathway	1/225	30/8142	0.56925	0.882209	0.882209	5211	1
hsa00630	hsa00630	Glyoxylate and dicarboxylate metabolism	1/225	30/8142	0.56925	0.882209	0.882209	112817	1
hsa01523	hsa01523	Antifolate resistance	1/225	30/8142	0.56925	0.882209	0.882209	1719	1
hsa05211	hsa05211	Renal cell carcinoma	2/225	69/8142	0.57285	0.882209	0.882209	5894/5908	2
hsa04917	hsa04917	Prolactin signaling pathway	2/225	70/8142	0.580722	0.882209	0.882209	5894/53358	2
hsa04710	hsa04710	Circadian rhythm	1/225	31/8142	0.581198	0.882209	0.882209	406	1
hsa05310	hsa05310	Asthma	1/225	31/8142	0.581198	0.882209	0.882209	6037	1
hsa04520	hsa04520	Adherens junction	2/225	71/8142	0.588487	0.882209	0.882209	6615/117178	2
hsa04215	hsa04215	Apoptosis - multiple species	1/225	32/8142	0.592815	0.882209	0.882209	10018	1
hsa05223	hsa05223	Non-small cell lung cancer	2/225	72/8142	0.596146	0.882209	0.882209	5894/7157	2
hsa04261	hsa04261	Adrenergic signaling in cardiomyocytes	4/225	150/8142	0.599368	0.882209	0.882209	107/492/783/2770	4
hsa05145	hsa05145	Toxoplasmosis	3/225	112/8142	0.602722	0.882209	0.882209	2770/3911/23643	3
hsa03410	hsa03410	Base excision repair	1/225	33/8142	0.604112	0.882209	0.882209	27343	1
hsa05012	hsa05012	Parkinson disease	7/225	266/8142	0.606953	0.882209	0.882209	1340/341947/2770/2861/4704/7157/51807	7
hsa04725	hsa04725	Cholinergic synapse	3/225	113/8142	0.608776	0.882209	0.882209	107/1131/2770	3
hsa04145	hsa04145	Phagosome	4/225	152/8142	0.609871	0.882209	0.882209	3107/4353/4842/51807	4
hsa04724	hsa04724	Glutamatergic synapse	3/225	114/8142	0.614768	0.882209	0.882209	107/2770/85358	3
hsa03320	hsa03320	PPAR signaling pathway	2/225	75/8142	0.618483	0.882209	0.882209	2172/10062	2
hsa05010	hsa05010	Alzheimer disease	10/225	384/8142	0.623032	0.882209	0.882209	1131/1340/341947/5609/4704/4842/5894/51807/7481/7484	10
hsa04714	hsa04714	Thermogenesis	6/225	232/8142	0.623867	0.882209	0.882209	107/1340/341947/4704/6199/6599	6
hsa05171	hsa05171	Coronavirus disease - COVID-19	6/225	232/8142	0.623867	0.882209	0.882209	716/3447/3441/4940/200916/25873	6
hsa04218	hsa04218	Cellular senescence	4/225	156/8142	0.630367	0.882209	0.882209	3107/10111/5894/7157	4
hsa05100	hsa05100	Bacterial invasion of epithelial cells	2/225	77/8142	0.632841	0.882209	0.882209	1213/53358	2
hsa05412	hsa05412	Arrhythmogenic right ventricular cardiomyopathy	2/225	77/8142	0.632841	0.882209	0.882209	783/3694	2
hsa00350	hsa00350	Tyrosine metabolism	1/225	36/8142	0.636164	0.882209	0.882209	220074	1
hsa00512	hsa00512	Mucin type O-glycan biosynthesis	1/225	36/8142	0.636164	0.882209	0.882209	2591	1
hsa03030	hsa03030	DNA replication	1/225	36/8142	0.636164	0.882209	0.882209	6117	1
hsa04612	hsa04612	Antigen processing and presentation	2/225	78/8142	0.639862	0.882209	0.882209	3107/3804	2
hsa04217	hsa04217	Necroptosis	4/225	159/8142	0.645282	0.882209	0.882209	79643/3447/3441/6775	4
hsa05216	hsa05216	Thyroid cancer	1/225	37/8142	0.646263	0.882209	0.882209	7157	1
hsa03018	hsa03018	RNA degradation	2/225	79/8142	0.646776	0.882209	0.882209	8761/5211	2
hsa00983	hsa00983	Drug metabolism - other enzymes	2/225	80/8142	0.653586	0.882209	0.882209	1807/4353	2
hsa05330	hsa05330	Allograft rejection	1/225	38/8142	0.656083	0.882209	0.882209	3107	1
hsa05340	hsa05340	Primary immunodeficiency	1/225	38/8142	0.656083	0.882209	0.882209	930	1
hsa00513	hsa00513	Various types of N-glycan biosynthesis	1/225	39/8142	0.665631	0.886767	0.886767	4122	1
hsa04662	hsa04662	B cell receptor signaling pathway	2/225	82/8142	0.666893	0.886767	0.886767	930/5894	2
hsa05203	hsa05203	Viral carcinogenesis	5/225	204/8142	0.670034	0.886767	0.886767	10013/9734/3107/8379/7157	5
hsa04110	hsa04110	Cell cycle	3/225	126/8142	0.681807	0.886767	0.886767	996/8379/7157	3
hsa05014	hsa05014	Amyotrophic lateral sclerosis	9/225	364/8142	0.682236	0.886767	0.886767	1340/341947/51164/83544/10013/4704/4842/7157/51807	9
hsa04216	hsa04216	Ferroptosis	1/225	41/8142	0.683944	0.886767	0.886767	7157	1
hsa05132	hsa05132	Salmonella infection	6/225	249/8142	0.691163	0.886767	0.886767	51164/23643/5609/5420/5894/51807	6
hsa04940	hsa04940	Type I diabetes mellitus	1/225	43/8142	0.701258	0.886767	0.886767	3107	1
hsa04975	hsa04975	Fat digestion and absorption	1/225	43/8142	0.701258	0.886767	0.886767	346606	1
hsa05207	hsa05207	Chemical carcinogenesis - receptor activation	5/225	212/8142	0.702631	0.886767	0.886767	107/2254/2770/5894/6199	5
hsa04114	hsa04114	Oocyte meiosis	3/225	131/8142	0.707068	0.886767	0.886767	107/996/8379	3
hsa04962	hsa04962	Vasopressin-regulated water reabsorption	1/225	44/8142	0.709557	0.886767	0.886767	51164	1
hsa04976	hsa04976	Bile secretion	2/225	89/8142	0.710245	0.886767	0.886767	107/6555	2
hsa05235	hsa05235	PD-L1 expression and PD-1 checkpoint pathway in cancer	2/225	89/8142	0.710245	0.886767	0.886767	5894/6199	2
hsa04728	hsa04728	Dopaminergic synapse	3/225	132/8142	0.711933	0.886767	0.886767	406/2770/220074	3
hsa05410	hsa05410	Hypertrophic cardiomyopathy	2/225	90/8142	0.71604	0.886767	0.886767	783/3694	2
hsa00190	hsa00190	Oxidative phosphorylation	3/225	134/8142	0.721476	0.886767	0.886767	1340/341947/4704	3
hsa04930	hsa04930	Type II diabetes mellitus	1/225	46/8142	0.725474	0.886767	0.886767	389692	1
hsa05222	hsa05222	Small cell lung cancer	2/225	92/8142	0.727338	0.886767	0.886767	3911/7157	2
hsa05322	hsa05322	Systemic lupus erythematosus	3/225	136/8142	0.730774	0.886767	0.886767	716/1511/1991	3
hsa00514	hsa00514	Other types of O-glycan biosynthesis	1/225	47/8142	0.733103	0.886767	0.886767	2591	1
hsa03420	hsa03420	Nucleotide excision repair	1/225	47/8142	0.733103	0.886767	0.886767	6117	1
hsa04973	hsa04973	Carbohydrate digestion and absorption	1/225	47/8142	0.733103	0.886767	0.886767	3938	1
hsa05030	hsa05030	Cocaine addiction	1/225	49/8142	0.747734	0.893873	0.893873	2770	1
hsa05215	hsa05215	Prostate cancer	2/225	97/8142	0.753932	0.893873	0.893873	5894/7157	2
hsa00510	hsa00510	N-Glycan biosynthesis	1/225	50/8142	0.754748	0.893873	0.893873	4122	1
hsa05110	hsa05110	Vibrio cholerae infection	1/225	50/8142	0.754748	0.893873	0.893873	9414	1
hsa00564	hsa00564	Glycerophospholipid metabolism	2/225	98/8142	0.758976	0.893873	0.893873	1609/8525	2
hsa04925	hsa04925	Aldosterone synthesis and secretion	2/225	98/8142	0.758976	0.893873	0.893873	107/492	2
hsa04913	hsa04913	Ovarian steroidogenesis	1/225	51/8142	0.761567	0.893873	0.893873	107	1
hsa04625	hsa04625	C-type lectin receptor signaling pathway	2/225	104/8142	0.787402	0.91643	0.91643	51266/5894	2
hsa04660	hsa04660	T cell receptor signaling pathway	2/225	104/8142	0.787402	0.91643	0.91643	5609/5894	2
hsa04922	hsa04922	Glucagon signaling pathway	2/225	107/8142	0.800482	0.916677	0.916677	2642/5211	2
hsa00480	hsa00480	Glutathione metabolism	1/225	58/8142	0.804298	0.916677	0.916677	6611	1
hsa04659	hsa04659	Th17 cell differentiation	2/225	108/8142	0.804682	0.916677	0.916677	3560/3566	2
hsa03008	hsa03008	Ribosome biogenesis in eukaryotes	2/225	109/8142	0.808803	0.916677	0.916677	54552/10528	2
hsa05168	hsa05168	Herpes simplex virus 1 infection	11/225	495/8142	0.814089	0.916677	0.916677	1967/3107/3447/3441/4940/7157/7700/148156/84527/79862/115509	11
hsa04390	hsa04390	Hippo signaling pathway	3/225	157/8142	0.814216	0.916677	0.916677	84612/7481/7484	3
hsa05416	hsa05416	Viral myocarditis	1/225	60/8142	0.815041	0.916677	0.916677	3107	1
hsa03010	hsa03010	Ribosome	3/225	158/8142	0.817581	0.916677	0.916677	51021/200916/25873	3
hsa00590	hsa00590	Arachidonic acid metabolism	1/225	61/8142	0.82019	0.916677	0.916677	5730	1
hsa04668	hsa04668	TNF signaling pathway	2/225	112/8142	0.820707	0.916677	0.916677	5609/7424	2
hsa04929	hsa04929	GnRH secretion	1/225	64/8142	0.834797	0.928669	0.928669	5894	1
hsa04927	hsa04927	Cortisol synthesis and secretion	1/225	65/8142	0.839398	0.928769	0.928769	107	1
hsa00970	hsa00970	Aminoacyl-tRNA biosynthesis	1/225	66/8142	0.843872	0.928769	0.928769	79731	1
hsa00010	hsa00010	Glycolysis / Gluconeogenesis	1/225	67/8142	0.848222	0.928769	0.928769	5211	1
hsa04152	hsa04152	AMPK signaling pathway	2/225	120/8142	0.849275	0.928769	0.928769	5211/6199	2
hsa04924	hsa04924	Renin secretion	1/225	69/8142	0.856563	0.928769	0.928769	2770	1
hsa05204	hsa05204	Chemical carcinogenesis - DNA adducts	1/225	69/8142	0.856563	0.928769	0.928769	1551	1
hsa04137	hsa04137	Mitophagy - animal	1/225	72/8142	0.868226	0.928769	0.928769	7157	1
hsa00562	hsa00562	Inositol phosphate metabolism	1/225	73/8142	0.8719	0.928769	0.928769	5305	1
hsa01524	hsa01524	Platinum drug resistance	1/225	73/8142	0.8719	0.928769	0.928769	7157	1
hsa04115	hsa04115	p53 signaling pathway	1/225	73/8142	0.8719	0.928769	0.928769	7157	1
hsa04380	hsa04380	Osteoclast differentiation	2/225	128/8142	0.873656	0.928769	0.928769	5609/55423	2
hsa04918	hsa04918	Thyroid hormone synthesis	1/225	75/8142	0.878945	0.928769	0.928769	107	1
hsa05152	hsa05152	Tuberculosis	3/225	180/8142	0.879489	0.928769	0.928769	3447/3441/5894	3
hsa04068	hsa04068	FoxO signaling pathway	2/225	131/8142	0.881827	0.928769	0.928769	10018/5894	2
hsa04270	hsa04270	Vascular smooth muscle contraction	2/225	134/8142	0.889509	0.933311	0.933311	107/5894	2
hsa04140	hsa04140	Autophagy - animal	2/225	141/8142	0.905673	0.945335	0.945335	5894/6199	2
hsa04120	hsa04120	Ubiquitin mediated proteolysis	2/225	142/8142	0.907794	0.945335	0.945335	996/65264	2
hsa04750	hsa04750	Inflammatory mediator regulation of TRP channels	1/225	98/8142	0.9369	0.97199	0.97199	107	1
hsa04064	hsa04064	NF-kappa B signaling pathway	1/225	104/8142	0.946779	0.975935	0.975935	23643	1
hsa05020	hsa05020	Prion disease	4/225	273/8142	0.947749	0.975935	0.975935	1340/341947/4704/51807	4
hsa03013	hsa03013	Nucleocytoplasmic transport	1/225	108/8142	0.952493	0.977188	0.977188	26019	1
hsa01200	hsa01200	Carbon metabolism	1/225	115/8142	0.961063	0.982341	0.982341	5211	1
hsa05206	hsa05206	MicroRNAs in cancer	4/225	310/8142	0.974801	0.989084	0.989084	10018/599/5894/7157	4
hsa05130	hsa05130	Pathogenic Escherichia coli infection	2/225	197/8142	0.974801	0.989084	0.989084	1366/51807	2
hsa05135	hsa05135	Yersinia infection	1/225	137/8142	0.979186	0.989604	0.989604	5609	1
hsa05017	hsa05017	Spinocerebellar ataxia	1/225	143/8142	0.982459	0.989604	0.989604	10528	1
hsa04141	hsa04141	Protein processing in endoplasmic reticulum	1/225	171/8142	0.99212	0.992704	0.992704	5609	1
hsa05131	hsa05131	Shigellosis	2/225	247/8142	0.992704	0.992704	0.992704	6199/7157	2
